# Supplementary material for: Evaluation of urban resilience level and analysis of obstacle factors: A case study of Hunan Province, China
Source: Frontiers journal article supplement (doi:10.3389/feart.2022.1033441), 2023-01-16
Supplement: Table_1.XLSX [file Table_1.XLSX]

## Sheet: 2020
准则层	领域层	指标名称	单位	长沙市	株洲市	湘潭市	衡阳市	邵阳市	岳阳市	常德市	张家界市	益阳市	郴州市	永州市	怀化市	娄底市	湘西州	备注
社会韧性（A1)	教育（B1）	教师与学生比	%	5.88813	5.7267	6.18648	6.07756	5.73706	6.33008	6.78872	6.20851	6.6481	6.02567	6.26338	6.18984	5.86268	6.39227	正
		教育事业支出占地方政府支出比例	%	15.3907	13.7928	13.1663	17.0629	18.4081	13.0887	13.274	13.9551	15.3804	17.0718	19.2423	18.3571	18.9397	16.5478	正
		万人高等教育学位数	人/万人	176.08	71.023	146.45	50.3237	13.4481	30.0604	29.0529	28.368	30.6747	19.239	16.2532	17.0187	22.842	33.1549	正
	健康（B2）	人口平均预期寿命	岁	77.1	75.91	75.19	73.77	73.63	75.1	75.62	75.04	75.68	75.25	73.86	74.57	74.6	73.26	正
		万人拥有医生数	人/万人	32.5869	28.2903	30.7026	27.8357	24.4914	27.1447	33.78	26.4237	28.8282	27.2809	27.2573	28.2983	27.0431	26.3041	正
		万人拥有医院床位数	张/万人	82.6773	76.2983	77.8866	75.4539	70.2004	76.2226	81.0781	68.5539	78.2178	76.4472	79.3814	84.4586	76.3298	88.4077	正
	社会保障（B3）	基本养老保险覆盖率	%	41.3556	59.4656	23.3719	20.9373	18.7457	53.1108	26.9527	64.7245	9.28994	13.0804	13.2548	14.6249	17.8206	7.50684	正
		社会保障财政支出占财政支出比例	%	8.44174	10.1616	12.7335	15.5599	13.5117	12.4982	13.9581	12.1362	14.2123	13.5752	14.7095	13.9126	13.8626	12.3277	正
	社会公平（B4）	保障性住房覆盖率	%	23.21	21.9	19.65	21.8654	19.9236	23.56	22.61	20.238	21.49	19.68	21.451	22.486	20.4512	23.094	正
		房价收入比		6.4	4.1	4.3	4.4	5.1	5.6	5.8	7.4	5.8	5.1	5.6	5.6	5.7	5.8	反
经济韧性（A2)	经济繁荣（B5）	城市居民人均可支配收入	元	57971.2	48788.2	41804	38478.5	30844.9	36749.2	35469	27884.2	33274.4	36988.5	32830	30329.4	32161.4	27852.6	正
		城镇登记失业率	%	3.27	2.5	3.1	3.49	3.2	1.89	3.11	3.6	2.2	2.61	2.05	2.4	2.3	2.84	反
		地方财政收入占GDP比	%	9.05982	6.58767	4.95786	4.94428	4.68009	3.81677	5.01076	5.77172	4.20398	5.72976	6.11045	5.95561	4.79839	8.89106	正
	结构优化	第三产业增加值占GDP比重	%	57.4822	45.4836	42.6439	54.368	51.1998	47.9662	46.4332	69.5714	39.9389	50.021	49.3154	55.8369	49.4107	56.4301	正
		高新技术产业增加值占工业增加值比重	%	101.127	78.5836	86.8089	70.8735	84.3143	69.0576	38.9732	52.0721	64.1318	73.6934	69.6671	73.1584	66.4605	29.6244	正
	创新潜力	研究与实验发展经费支出占财政支出比例	%	23.8152	21.6126	20.1666	10.9836	4.74905	11.5211	9.19584	1.99065	9.06941	6.54734	6.83852	6.46095	9.14934	1.42174	正
		万人有效发明专利拥有量	件/万人	32.8125	10.835	15.2045	2.93126	4.89675	4.69644	7.37505	7.53361	5.254	6.45361	5.7815	10.2736	7.11934	3.3006	正
城市基础设施与服务韧性（A3)	生态环境管理	城市空气质量达标率	%	84.4	86.6	86.1	92.1	93.4	90.7	84.7	97.8	84.4	95.4	96.4	98.1	95.9	99.5	正
		工业固体废物综合利用率	%	82	89.63	80	74.53	76.01	72.44	99.87	98.98	93.96	58	96	95	91.46	78.5792	正	中国城市统计年鉴
		人均公园绿地面积	平方米	2.57899	1.10681	1.07748	1.19489	0.939318	1.35618	1.18653	3.85579	1.04145	1.14579	1.72954	0.875049	1.27495	0.546074	正
		万元GDP能耗	吨标准煤/万元	-2.77	-2.4	-1.52	-3.63	-4.68	-3.34	-1.04	-3.07	-1.06	-0.46	-1.9	-1.8	-2.52	-0.22	反
	关键基础设施	公共交通线网密度	公里/平方公里	7.7981	6.9037	6.98431	5.57532	6.05748	6.4056	6.80407	5.30496	6.17187	4.00388	6.05498	6.03495	5.79439	4.7833	正
		城市天燃气普及率	%	99.6755	95.9809	98.6316	96.536	95.6512	97.3063	96.6085	87.8756	99.9148	90.7213	99.1382	92.8031	97.9068	90.3908	正
		互联网用户普及率	户/百人	43.1874	30.053	42.561	26.7306	8.65656	31.1994	30.3076	38.6897	16.3879	29.6986	24.4949	28.5864	36.2891	26.8475	正
城市管治韧性（A4)	社会整合	社区卫生服务中心占比	%	15.7018	1.31752	1.1052	0.931139	0.877193	1.26152	2.52515	1.77743	1.12782	1.04216	0.673094	0.407201	0.440852	0.336494	正
		公共管理、社会保障和社会组织人员占比	%	1.18033	1.37196	1.19629	1.15331	1.03485	1.31364	1.26073	2.11409	1.143	1.17982	1.2724	1.45009	1.14199	1.40183	正
	应急管理	人均避难场所面积	平方米/人	1.18745	0.338193	1.07748	0.89378	0.939318	1.35618	1.18653	3.85579	1.04145	1.14579	1.72954	0.875049	1.27495	0.546074	正
		具备应急改造条件的城市大型公共设施数	个	68	25	13	37	27	38	23	9	27	26	24	30	14	8	正

## Sheet: 2015
准则层	领域层	指标名称	长沙市	株洲市	湘潭市	衡阳市	邵阳市	岳阳市	常德市	张家界市	益阳市	郴州市	永州市	怀化市	娄底市	湘西州	备注
社会韧性（A1)	教育（B1）	教师与学生比	5.52888	5.84145	6.27381	5.35055	5.09066	6.19016	7.14404	5.74225	6.4698	5.20162	5.5453	6.6296	5.66192	6.63187	正
		教育事业支出占地方政府支出比例	15.6209	12.6295	12.5835	15.3968	17.503	14.0405	13.7651	14.6705	16.1026	17.1962	17.6424	17.1015	15.4342	16.913	正
		万人高等教育学位数	193.365	52.9784	116.532	37.2606	10.0679	21.5892	18.7016	22.0997	19.1465	12.862	12.2106	15.0645	15.6258	25.2951	正
	健康（B2）	人口平均预期寿命	76	75.83	75.9	75.02	72.18	72.35	73.52	72.08	74.96	72.91	71.5	72.52	72.36	71.54	正
		万人拥有医生数	33.9204	20.4949	22.0208	21.6613	15.0048	21.9427	20.346	19.4357	20.6589	19.4875	18.0857	18.5735	18.9963	18.2843	正
		万人拥有医院床位数	88.1832	55.1431	58.8058	55.4126	45.4412	53.3415	55.1344	52.2572	50.9047	60.9086	59.9886	57.5037	52.9857	60.1518	正
	社会保障（B3）	基本养老保险覆盖率	27.6124	21.8473	16.149	63.2055	10.218	29.7413	17.3001	0.636483	13.4076	7.67409	9.60642	11.2188	12.635	4.66882	正
		社会保障财政支出占财政支出比例	7.34507	13.0918	15.9309	15.3175	16.8069	18.6887	16.5264	12.9665	17.6109	13.3356	15.8785	16.8539	16.1244	12.8439	正
	社会公平（B4）	保障性住房覆盖率	21.01	18.6	18.43	18.532	18.7215	20.1023	19.28	17.75	19.53	18.75	18.03	20.3	18.56	19.35	正
		房价收入比	4.88	3.73	3.83	3.88	4.23	4.48	4.58	5.38	4.58	4.23	4.48	4.48	4.53	4.58	反
经济韧性（A2)	经济繁荣（B5）	城市居民人均可支配收入	39961	33977	29237	26515	21070	25202	24513	19473	22571	25534	21938	20693	21838	19267	正
		城镇登记失业率	2.6	2.72	4.2	3.58	3.7	2.8	2.58	3.29	3.3	3.59	3.75	4.25	4.2	4.32	反
		地方财政收入占GDP比	8.44813	8.1951	6.89248	74.8167	6.61236	4.43402	5.48702	7.05296	5.06359	8.08377	6.52103	5.7774	4.63913	9.27241	正
	结构优化	第三产业增加值占GDP比重	45.0612	35.0502	36.9139	40.1568	41.7859	38.8777	41.2083	65.6645	39.33	35.5778	41.714	43.6835	35.0201	52.8446	正
		高新技术产业增加值占工业增加值比重	72.8966	44.4959	630.118	31.9757	54.3415	41.0429	19.4811	9.02548	45.0021	45.0665	30.63	13.1725	24.3261	16.244	正
	创新潜力	研究与实验发展经费支出占财政支出比例	20.3587	12.7354	8.88249	3.97171	2.37219	12.8567	7.25783	0.44253	4.64677	4.07143	1.2396	1.32833	4.85191	0.384831	正
		万人有效发明专利拥有量	19.6897	15.0831	13.369	2.2678	3.21412	3.24025	3.87926	3.18898	1.16548	3.87933	4.39619	2.03811	4.17635	0.89201	正
城市基础设施与服务韧性（A3)	生态环境管理	城市空气质量达标率	70.7	77	73.6986	91	77.8082	74.6	76.7	95.3	78.9	87.5	81.1	78.6	89.8	99.3	正
		工业固体废物综合利用率	85.5	90.12	98.15	87.27	66	88.2	97.42	97.3	84.98	48.5	82.2	89	97		正
		人均公园绿地面积	7.76	10.52	12.0833	7.73667	9.395	8.14667	12.235	10.73	8.255	11.41	11.97	10.57	9.43	9.15667	正
		万元GDP能耗	-6	-8	-7	-9	-7	-7	-8	1	-6	-7	-7	-5	-7	-7	反
	关键基础设施	公共交通线网密度	6.28	5.345	4.65333	5.165	5.315	5.23	5.065	4.43	5.58	2.83	5.4	5.75	5.5	4.58667	正
		城市天燃气普及率	96.31	86.505	89.74	83.34	81.725	97.59	96.74	88.28	80.885	80.35	90.6	78.945	96.54	92.5733	正
		互联网用户普及率	24.2566	0.16123	14.7324	9.9448	4.59947	10.4633	10.4896	15.4856	9.45535	13.4878	32.4567	10.0967	11.7336	8.9201	正
城市管治韧性（A4)	社会整合	社区卫生服务中心占比	15.8416	0.87073	1.09933	0.464885	1.58311	0.665557	1.62554	0.58651	1.09739	0.456432	0.49975	0.49904	0.348779	0.161031	正
		公共管理、社会保障和社会组织人员占比	1.0797	1.21185	0.938804	1.04168	0.890329	1.19747	0.968668	1.41844	0.898077	1.12716	1.23987	1.25126	1.13144	1.42661	正
	应急管理	人均避难场所面积	2.75169	1.19235	0.864114	0.962635	0.8655	0.891779	0.571536	1.45013	0.817423	1.1268	1.53047	0.82014	1.08993	0.662997	正
		具备应急改造条件的城市大型公共设施数	23	17	12	27	27	22	19	9	16	23	24	30	12	19	正
		保障性住房覆盖率	6.4	4.1	4.3	4.4	5.1	5.6	5.8	7.4	5.8	5.1	5.6	5.6	5.7	5.8
			5.72	4.57	4.67	4.72	5.07	5.32	5.42	6.22	5.42	5.07	5.32	5.32	5.37	5.42

## Sheet: 2010
准则层	领域层	指标名称	长沙市	株洲市	湘潭市	衡阳市	邵阳市	岳阳市	常德市	张家界市	益阳市	郴州市	永州市	怀化市	娄底市	湘西州	备注
社会韧性（A1)	教育（B1）	教师与学生比	5.62168	6.30974	6.00937	5.24852	5.20998	6.15837	6.98722	6.09612	7.64459	5.44095	6.12848	6.78554	5.66816	5.77805	正
		教育事业支出占地方政府支出比例	13.3719	14.0582	13.9125	14.1699	17.2357	16.2523	16.7308	13.6141	16.9998	19.7012	20.8221	16.7401	15.2927	14.1336	正
		万人高等教育学位数	201.069	46.999	100.934	30.6194	29.3073	64.3702	55.1083	70.1188	48.3648	37.6825	45.5779	51.9394	57.4322	76.9242	正
	健康（B2）	人口平均预期寿命	76.01	74.91	75.19	73.77	73.63	75.1	75.62	75.04	75.68	75.25	73.86	74.57	74.6	73.26	正
		万人拥有医生数	25.9264	20.0954	20.0821	14.4578	38.9423	45.2383	50.823	50.0785	39.8019	58.0098	42.9922	49.6919	52.7667	59.08	正
		万人拥有医院床位数	60.5465	43.0064	40.5094	30.6292	91.6527	96.2024	109.385	125.51	79.3459	131.005	106.157	128.406	96.085	152.465	正
	社会保障（B3）	基本养老保险覆盖率	19.4853	17.1113	6.17688	7.74999	33.2875	37.4665	44.8744	26.2721	13897.4	8.5859	24.5072	11.0926	35.877	13.3193	正
		社会保障财政支出占财政支出比例	10.5243	15.7761	21.9091	18.0016	17.9204	18.1147	21.1118	15.0699	21.3738	14.9425	17.8769	18.5188	15.7857	16.3407	正
	社会公平（B4）	保障性住房覆盖率	18.81	15.3	17.21	15.1986	17.5194	16.6446	15.95	15.262	17.57	17.82	14.609	18.114	16.6688	15.606	正
		房价收入比	5.72	4.57	4.67	4.72	5.07	5.32	5.42	6.22	5.42	5.07	5.32	5.32	5.37	5.42	反
经济韧性（A2)	经济繁荣（B5）	城市居民人均可支配收入	22814	19643	18059	15635	11698	17312	15502	12705	15398	15342	15041	12523	15025	12115	正
		城镇登记失业率	3	3.6	4.1	4.2	4.17	4.1	4.1	4.3	4.2	4.05	4.1	4.2	4.3	4.3	反
		地方财政收入占GDP比	6.9118	6.11835	5.29967	5.34328	4.33497	3.37147	4.68499	5.89979	3.43905	5.7971	4.30319	5.2852	4.42131	5.85857	正
	结构优化	第三产业增加值占GDP比重	41.9616	32.5187	33.399	35.9203	37.8886	31.8054	35.2088	62.3474	36.7145	33.3336	38.8287	42.7591	31.5378	43.7834	正
		高新技术产业增加值占工业增加值比重	34.3365	74.1744	44.71	25.9851	22.0965	24.1975	15.5202	11.2934	19.5607	14.1647	8.25826	11.2895	36.5781	13.0939	正
	创新潜力	研究与实验发展经费支出占财政支出比例	15.1113	21.3606	18.2738	5.23479	1.15034	8.48811	9.16887	0.348887	2.49668	2.37193	2.04087	1.1102	9.11112	0.418117	正
		万人有效发明专利拥有量	8.81873	5.90081	4.04404	0.344133	0.585331	0.888947	4.45856	1.52432	0.936355	1.43098	1.97813	0.253752	4.15009	2.82622	正
城市基础设施与服务韧性（A3)	生态环境管理	城市空气质量达标率	92.6	94.5	92.88	99.7	91.2	88.6	89.3	92.1	90.9589	1	95.62	92.0548	91.7808	1	正
		工业固体废物综合利用率	99.7	82.66	96.9	80.54	91.75	96.12	93.39	93	99.96	70.87	94	37.95	99.15	78.35	正
		人均公园绿地面积	7.755	9.195	9.09	7.58	9.495	7.40333	10.54	7.68	5.195	8.675	5.64	11.495	9.07	6.27333	正
		万元GDP能耗（上升或下降）	-2.29	-3.27	-2.88	-5.09	-5.3	-2.84	-2.72	-4.6	-4.02	-4.42	-4.38	-3.15	-4.47	-2.18	反
	关键基础设施	公共交通线网密度	4.7619	3.7863	2.32236	4.75468	4.57252	4.0544	3.32593	3.55504	4.98813	1.65612	4.74502	5.46505	5.20561	4.39003	正
		城市天燃气普及率	94.605	62.735	78.2633	84.33	60.395	84.9067	91.01	95.16	67.45	72.695	83.25	72.545	94.4	66.0233	正
		互联网用户普及率	12.5627	7.20749	5.41385	4.54927	9.2635	16.4324	14.2073	41.6947	11.1073	13.5026	10.2147	15.5441	16.311	18.641	正
城市管治韧性（A4)	社会整合	社区卫生服务中心占比	14.0883	1.83959	0.924809	0.234512	1.64384	0.601464	1.42552	1.81269	2.83843	1.1213	2.26782	1.29422	0.224341	1.92926	正
		公共管理、社会保障和社会组织人员占比	1.12985	0.967359	1.04843	1.06712	3.1357	4.38591	3.09448	4.21296	3.50387	4.22433	4.13732	4.46437	4.24114	5.6368	正
	应急管理	人均避难场所面积	1.96713	0.982604	0.781193	0.408017	2.69761	2.99802	1.54779	1.68124	0.726014	7.33837	4.56387	2.8384	3.05606	2.30006	正
		具备应急改造条件的城市大型公共设施数	23	16	11	25	24	18	19	7	16	24	28	12	23	18	正

## Sheet: 原始数据
GDP	长沙市	株洲市	湘潭市	衡阳市	邵阳市	岳阳市	常德市	张家界市	益阳市	郴州市	永州市	怀化市	娄底市	湘西州	备注
2020	12142.5	3105.8	2343.15	3508.5	2250.81	4001.55	3749.13	556.68	1853.48	2503.07	2107.7	1671.87	1679.94	725.11	亿元	省年鉴21-1
2015	8510.13	2335.11	1703.1	2601.58	1387	2886.28	2709.02	447.7	1354.41	2012.07	1418.18	1273.25	1291.66	497.44		省年鉴19-2
2010	4547.06	1275.48	894.01	1420.34	727.29	1539.36	1494.57	242.48	712.28	1081.76	767.01	674.92	678.71	303.54
第三产业值	长沙市	株洲市	湘潭市	衡阳市	邵阳市	岳阳市	常德市	张家界市	益阳市	郴州市	永州市	怀化市	娄底市	湘西州	备注
2020	6979.79	1412.63	999.21	1907.5	1152.41	1919.39	1740.84	387.29	740.26	1252.06	1039.42	933.52	830.07	409.18	亿元	省年鉴21-1
2015	3834.77	818.46	628.68	1044.71	579.57	1122.12	1116.34	293.98	532.69	715.85	591.58	556.2	452.34	262.87		省年鉴19-2
2010	1908.02	414.77	298.59	510.19	275.56	489.6	526.22	151.18	261.51	360.59	297.82	288.59	214.05	132.9
年末常住人口	长沙市	株洲市	湘潭市	衡阳市	邵阳市	岳阳市	常德市	张家界市	益阳市	郴州市	永州市	怀化市	娄底市	湘西州	备注
2020	1006.08	390.31	272.55	664.22	656.15	504.85	527.59	151.72	385.04	467.8	529.62	458.26	382.76	248.44	万人	省年鉴21
2015	743.18	400.05	282.37	733.75	726.17	562.92	584.39	152.4	441.02	473.02	542.97	490.16	387.18	263.45		省年鉴19-9
2010	704.07	385.71	275.22	714.84	196.47	152.99	173.15	44.61	147.38	136.27	148.12	137.93	110.6	66.52
地方财政收入	长沙市	株洲市	湘潭市	衡阳市	邵阳市	岳阳市	常德市	张家界市	益阳市	郴州市	永州市	怀化市	娄底市	湘西州	备注
2020	1100.09	204.6	116.17	173.47	105.34	152.73	187.86	32.13	77.92	143.42	128.79	99.57	80.61	64.47	亿元	省年鉴21-13
2015	718.947	191.365	117.386	1946.42	91.7135	127.978	148.644	31.5761	68.5818	162.651	92.4799	73.5607	59.9218	46.1247	亿元	省年鉴19-24
2010	314.284	78.0383	47.3796	75.8927	31.5278	51.899	70.0205	14.3058	24.4957	62.7107	33.0059	35.6709	30.0079	17.7831
教育事业支出	长沙市	株洲市	湘潭市	衡阳市	邵阳市	岳阳市	常德市	张家界市	益阳市	郴州市	永州市	怀化市	娄底市	湘西州	备注
2020	231.05	64.8	38.63	98.54	108.65	71.15	81.5	27.62	59.25	79.29	96.45	88.43	62.41	59.17	亿元	省年鉴21-14
2015	144.493	44.2167	29.0861	75.7336	75.6362	52.7649	58.7114	19.6555	44.2843	65.1424	62.3193	58.1335	36.6982	41.655		省年鉴19-25
2010	53.9336	22.0683	14.8597	29.6625	27.8553	26.8713	29.6639	7.4999	19.8474	31.748	30.0649	24.3654	16.3117	14.7144
财政支出	长沙市	株洲市	湘潭市	衡阳市	邵阳市	岳阳市	常德市	张家界市	益阳市	郴州市	永州市	怀化市	娄底市	湘西州	备注
2020	1501.23	469.81	293.4	577.51	590.23	543.6	613.98	197.92	385.23	464.45	501.24	481.72	329.52	357.57	亿元	省年鉴21-14
2015	924.999	350.106	231.145	491.878	432.133	375.805	426.523	133.98	275.013	378.818	353.236	339.932	237.772	246.29		省年鉴19-25
2010	403.335	156.978	106.808	209.334	161.614	165.338	177.301	55.0894	116.751	161.147	144.389	145.551	106.663	104.11
社会保障财政支出	长沙市	株洲市	湘潭市	衡阳市	邵阳市	岳阳市	常德市	张家界市	益阳市	郴州市	永州市	怀化市	娄底市	湘西州	备注
2020	126.73	47.74	37.36	89.86	79.75	67.94	85.7	24.02	54.75	63.05	73.73	67.02	45.68	44.08	亿元	省年鉴21-14
2015	67.9418	45.8351	36.8234	75.3435	72.628	70.2332	70.4889	17.3724	48.4321	50.5175	56.0887	57.2917	38.3394	31.6333		省年鉴19-25
2010	42.448	24.7651	23.4006	37.6835	28.9619	29.9506	37.4314	8.3019	24.9541	24.0794	25.8124	26.9542	16.8375	17.0122
高新技术产业增加值	长沙市	株洲市	湘潭市	衡阳市	邵阳市	岳阳市	常德市	张家界市	益阳市	郴州市	永州市	怀化市	娄底市	湘西州	备注
2020	3509.1	873.85	846.17	591.81	446.95	945.84	479.37	23.12	429.11	605.76	369.41	284.03	347.11	48.67	亿元	省年鉴21-44
2015	2730	525.942	5365.77	321.866	232.527	536.636	217.74	7.5453	231.446	457.876	101.128	62.1876	144.346	23.0015		省年鉴19-60
2010	693.83	272.517	201.794	146.229	52.5565	181.852	95.8062	5.4432	50.7717	78.3733	19.5539	28.7272	110.246	13.3833
研究与实验发展经费支出	长沙市	株洲市	湘潭市	衡阳市	邵阳市	岳阳市	常德市	张家界市	益阳市	郴州市	永州市	怀化市	娄底市	湘西州	备注
2020	3575208	1015382	591689	634314	280303	626289	564606	39399	349381	304091	342774	311237	301489	50837	万元	省年鉴21-45
2015	1883174	445873	205314	195360	102510	483160	309563	5929	127792	154233	43787	45154	115365	9478		省年鉴21-45
2010	609493	335315	195179	109582	18591	140341	162565	1922	29149	38223	29468	16159	97182	4353
教师数	长沙市	株洲市	湘潭市	衡阳市	邵阳市	岳阳市	常德市	张家界市	益阳市	郴州市	永州市	怀化市	娄底市	湘西州	备注
2020	115630	36555	28039	74008	66855	46118	43943	14158	35278	54102	61226	45704	40726	28609	人	省年鉴21-59
2015	85133	31261	26040	62079	56990	42269	41852	12192	30851	41795	47734	41705	33801	26329		省年鉴19-78
2010	75688	29968	26587	61752	55769	44780	44872	12061	38312	38289	51561	40070	34982	25258
学生数	长沙市	株洲市	湘潭市	衡阳市	邵阳市	岳阳市	常德市	张家界市	益阳市	郴州市	永州市	怀化市	娄底市	湘西州	备注
2020	1963783	638326	453230	1217725	1165319	728553	647294	228042	530648	897859	977524	738371	694665	447556	人	省年鉴21-60
2015	1539788	535158	415059	1160235	1119501	682842	585831	212321	476846	803499	860801	629073	596988	397007		省年鉴19-79
2010	1346358	474948	442426	1176561	1070427	727140	642201	197847	501165	703719	841334	590520	617167	437137
高等教育学位数	长沙市	株洲市	湘潭市	衡阳市	邵阳市	岳阳市	常德市	张家界市	益阳市	郴州市	永州市	怀化市	娄底市	湘西州	备注
2020	177151	27721	39915	33426	8824	15176	15328	4304	11811	9000	8608	7799	8743	8237	人	省年鉴21-56
2015	143705	21194	32905	27340	7311	12153	10929	3368	8444	6084	6630	7384	6050	6664		省年鉴19-75
2010	141567	18128	27779	21888	5758	9848	9542	3128	7128	5135	6751	7164	6352	5117
艺术馆文化馆公共图书馆	长沙市	株洲市	湘潭市	衡阳市	邵阳市	岳阳市	常德市	张家界市	益阳市	郴州市	永州市	怀化市	娄底市	湘西州	备注
2020	23	18	13	28	27	22	19	9	16	26	24	30	14	20	人	省年鉴21-61
2015	23	17	12	27	27	22	19	9	16	23	24	30	12	19
2010	23	16	11	25	24	18	19	7	16	24	28	12	23	18
医生数	长沙市	株洲市	湘潭市	衡阳市	邵阳市	岳阳市	常德市	张家界市	益阳市	郴州市	永州市	怀化市	娄底市	湘西州	备注
2020	32785	11042	8368	18489	16070	13704	17822	4009	11100	12762	14436	12968	10351	6535	人	省年鉴21-62
2015	25209	8199	6218	15894	10896	12352	11890	2962	9111	9218	9820	9104	7355	4817
2010	18254	7751	5527	10335	7651	6921	8800	2234	5866	7905	6368	6854	5836	3930
医院床位数	长沙市	株洲市	湘潭市	衡阳市	邵阳市	岳阳市	常德市	张家界市	益阳市	郴州市	永州市	怀化市	娄底市	湘西州	备注
2020	83180	29780	21228	50118	46062	38481	42776	10401	30117	35762	42042	38704	29216	21964	张	省年鉴21-62
2015	65536	22060	16605	40659	32998	30027	32220	7964	22450	28811	32572	28186	20515	15847
2010	42629	16588	11149	21895	18007	14718	18940	5599	11694	17852	15724	17711	10627	10142
城市居民人均可支配收入	长沙市	株洲市	湘潭市	衡阳市	邵阳市	岳阳市	常德市	张家界市	益阳市	郴州市	永州市	怀化市	娄底市	湘西州	备注
2020	57971.2	48788.2	41804	38478.5	30844.9	36749.2	35469	27884.2	33274.4	36988.5	32830	30329.4	32161.4	27852.6	元	省年鉴21-65
2015	39961	33977	29237	26515	21070	25202	24513	19473	22571	25534	21938	20693	21838	19267
2010	22814	19643	18059	15635	11698	17312	15502	12705	15398	15342	15041	12523	15025	12115
万元GDP能耗上升或下降	长沙市	株洲市	湘潭市	衡阳市	邵阳市	岳阳市	常德市	张家界市	益阳市	郴州市	永州市	怀化市	娄底市	湘西州	备注	省年鉴21-66
2020	-2.77	-2.4	-1.52	-3.63	-4.68	-3.34	-1.04	-3.07	-1.06	-0.46	-1.9	-1.8	-2.52	-0.22	±%
2015	-6	-8	-7	-9	-7	-7	-8	1	-6	-7	-7	-5	-7	-7
2010	-2.29	-3.27	-2.88	-5.09	-5.3	-2.84	-2.72	-4.6	-4.02	-4.42	-4.38	-3.15	-4.47	-2.18
	0.826	1.272	1.669	1.103	1.169	1.255	0.912	0.859	1.054	1.393	1.177	1.145	2.306	1.206
公共管理、社会保障和社会组织人员	长沙市	株洲市	湘潭市	衡阳市	邵阳市	岳阳市	常德市	张家界市	益阳市	郴州市	永州市	怀化市	娄底市	湘西州	备注
2020	118751	53549	32605	76605	67902	66319	66515	32075	44010	55192	67389	66452	43711	34827
2015	80241	48480	26509	76433	64653	67408	56608	21617	39607	53317	67321	61332	43807	37584		省年鉴19-11
2010	79549	37312	28855	76282	61607	67100	53581	18794	51640	57565	61282	61577	46907	37496
第三产业值增加值	长沙市	株洲市	湘潭市	衡阳市	邵阳市	岳阳市	常德市	张家界市	益阳市	郴州市	永州市	怀化市	娄底市	湘西州	备注
2020	6979.79	1412.63	999.21	1907.5	1152.41	1919.39	1740.84	387.29	740.26	1252.06	1039.42	933.52	830.07	409.18	亿元
2015	3834.77	818.46	628.68	1044.71	579.57	1122.12	1116.34	293.98	532.69	715.85	591.58	556.2	452.34	262.87
2010	1908.02	414.77	298.59	510.19	275.56	489.6	526.22	151.18	261.51	360.59	297.82	288.59	214.05	132.9
公园绿地面积	长沙市	株洲市	湘潭市	衡阳市	邵阳市	岳阳市	常德市	张家界市	益阳市	郴州市	永州市	怀化市	娄底市	湘西州	备注
2020	25.9467	4.32	2.93667	7.93667	6.16333	6.84667	6.26	5.85	4.01	5.36	9.16	4.01	4.88	1.35667
2015	20.45	4.77	2.44	7.06333	6.285	5.02	3.34	2.21	3.605	5.33	8.31	4.02	4.22	1.74667
2010	13.85	3.79	2.15	2.91667	5.3	4.58667	2.68	0.75	1.07	10	6.76	3.915	3.38	1.53
城镇登记失业率	长沙市	株洲市	湘潭市	衡阳市	邵阳市	岳阳市	常德市	张家界市	益阳市	郴州市	永州市	怀化市	娄底市	湘西州	备注
2020	3.27	2.5	3.1	3.49	3.2	1.89	3.11	3.6	2.2	2.61	2.05	2.4	2.3	2.84		统计公报
2015	2.6	2.72	4.2	3.58	3.7	2.8	2.58	3.29	3.3	3.59	3.75	4.25	4.2	4.32
2010	3	3.59	4.1	4.2	4.17	4.1	4.1	4.3	4.2	4.05	4.1	4.2	4.3	4.3
工业增加值	长沙市	株洲市	湘潭市	衡阳市	邵阳市	岳阳市	常德市	张家界市	益阳市	郴州市	永州市	怀化市	娄底市	湘西州	备注
2020	3470	1112	974.75	835.023	530.1	1369.64	1230	44.4	669.106	822	530.25	388.24	522.28	164.29
2015	3745.03	1182	851.55	1006.59	427.9	1307.5	1117.7	83.6	514.3	1016	330.16	472.1	593.38	141.6
2010	2020.68	367.4	451.34	562.74	237.85	751.53	617.3	48.198	259.56	553.3	236.78	254.46	301.4	102.21
发明专利	长沙市	株洲市	湘潭市	衡阳市	邵阳市	岳阳市	常德市	张家界市	益阳市	郴州市	永州市	怀化市	娄底市	湘西州	备注
2020	33012	4229	4144	1947	3213	2371	3891	1143	2023	3019	3062	4708	2725	820
2015	14633	6034	3775	1664	2334	1824	2267	486	514	1835	2387	999	1617	235
2010	6209	2276	1113	246	115	136	772	68	138	195	293	35	459	188
空气质量	长沙市	株洲市	湘潭市	衡阳市	邵阳市	岳阳市	常德市	张家界市	益阳市	郴州市	永州市	怀化市	娄底市	湘西州	备注
2020	84.4	86.6	86.1	92.1	93.4	90.7	84.7	97.8	84.4	95.4	96.4	98.1	95.9	99.5
2015	70.7	77	73.6986	91	77.8082	74.6	76.7	95.3	78.9	87.5	81.1	78.6	89.8	99.3
2010	92.6	94.5	92.88	99.7	91.2	88.6	89.3	92.1	90.9589	1	95.62	92.0548	91.7808	1
基本养老保险覆	长沙市	株洲市	湘潭市	衡阳市	邵阳市	岳阳市	常德市	张家界市	益阳市	郴州市	永州市	怀化市	娄底市	湘西州	备注
2020	416.07	232.1	63.7	139.07	123	268.13	142.2	98.2	35.77	61.19	70.2	67.02	68.21	18.65	万人
2015	205.21	87.4	45.6	463.77	74.2	167.42	101.1	0.97	59.13	36.3	52.16	54.99	48.92	12.3
2010	137.19	66	17	55.4	65.4	57.32	77.7	11.72	20482	11.7	36.3	15.3	39.68	8.86
社卫生服务中比	长沙市	株洲市	湘潭市	衡阳市	邵阳市	岳阳市	常德市	张家界市	益阳市	郴州市	永州市	怀化市	娄底市	湘西州	备注
2020	735	40	27	43	23	52	128	23	21	44	37	19	18	11
2015	576	26	28	28	18	32	83	8	16	22	30	26	14	6
2010	418	25	23	12	12	23	60	6	13	11	21	15	8	6
医疗机构数	长沙市	株洲市	湘潭市	衡阳市	邵阳市	岳阳市	常德市	张家界市	益阳市	郴州市	永州市	怀化市	娄底市	湘西州	备注
2020	4681	3036	2443	4618	2622	4122	5069	1294	1862	4222	5497	4666	4083	3269
2015	3636	2986	2547	6023	1137	4808	5106	1364	1458	4820	6003	5210	4014	3726
2010	2967	1359	2487	5117	730	3824	4209	331	458	981	926	1159	3566	311
互联网宽带用户	长沙市	株洲市	湘潭市	衡阳市	邵阳市	岳阳市	常德市	张家界市	益阳市	郴州市	永州市	怀化市	娄底市	湘西州	备注
2020	434.5	117.3	116	177.55	56.8	157.51	159.9	58.7	63.1	138.93	129.73	131	138.9	66.7	万户
2015	180.27	0.645	41.6	72.97	33.4	58.9	61.3	23.6	41.7	63.8	176.23	49.49	45.43	23.5
2010	88.45	27.8	14.9	32.52	18.2	25.14	24.6	18.6	16.37	18.4	15.13	21.44	18.04	12.4
人均避难场面积	2.57899	1.10681	1.07748	1.19489	0.939318	1.35618	1.18653	3.85579	1.04145	1.14579	1.72954	0.875049	1.27495	0.546074
2015	2.75169	1.19235	0.864114	0.962635	0.8655	0.891779	0.571536	1.45013	0.817423	1.1268	1.53047	0.82014	1.08993	0.662997
2010	1.96713	0.982604	0.781193	0.408017	2.69761	2.99802	1.54779	1.68124	0.726014	7.33837	4.56387	2.8384	3.05606	2.30006
教师与学生比	5.88813	5.7267	6.18648	6.07756	5.73706	6.33008	6.78872	6.20851	6.6481	6.02567	6.26338	6.18984	5.86268	6.39227
2015	5.52888	5.84145	6.27381	5.35055	5.09066	6.19016	7.14404	5.74225	6.4698	5.20162	5.5453	6.6296	5.66192	6.63187
2010	5.62168	6.30974	6.00937	5.24852	5.20998	6.15837	6.98722	6.09612	7.64459	5.44095	6.12848	6.78554	5.66816	5.77805
教育事业支出占地方政府支出比例	15.3907	13.7928	13.1663	17.0629	18.4081	13.0887	13.274	13.9551	15.3804	17.0718	19.2423	18.3571	18.9397	16.5478
2015	15.6209	12.6295	12.5835	15.3968	17.503	14.0405	13.7651	14.6705	16.1026	17.1962	17.6424	17.1015	15.4342	16.913
2010	13.3719	14.0582	13.9125	14.1699	17.2357	16.2523	16.7308	13.6141	16.9998	19.7012	20.8221	16.7401	15.2927	14.1336
万人高等教育学位数	176.08	71.023	146.45	50.3237	13.4481	30.0604	29.0529	28.368	30.6747	19.239	16.2532	17.0187	22.842	33.1549
2015	193.365	52.9784	116.532	37.2606	10.0679	21.5892	18.7016	22.0997	19.1465	12.862	12.2106	15.0645	15.6258	25.2951
2010	201.069	46.999	100.934	30.6194	29.3073	64.3702	55.1083	70.1188	48.3648	37.6825	45.5779	51.9394	57.4322	76.9242
万人拥有医生数	32.5869	28.2903	30.7026	27.8357	24.4914	27.1447	33.78	26.4237	28.8282	27.2809	27.2573	28.2983	27.0431	26.3041
2015	33.9204	20.4949	22.0208	21.6613	15.0048	21.9427	20.346	19.4357	20.6589	19.4875	18.0857	18.5735	18.9963	18.2843
2010	25.9264	20.0954	20.0821	14.4578	38.9423	45.2383	50.823	50.0785	39.8019	58.0098	42.9922	49.6919	52.7667	59.08
万人拥有医院床位数	82.6773	76.2983	77.8866	75.4539	70.2004	76.2226	81.0781	68.5539	78.2178	76.4472	79.3814	84.4586	76.3298	88.4077
2015	88.1832	55.1431	58.8058	55.4126	45.4412	53.3415	55.1344	52.2572	50.9047	60.9086	59.9886	57.5037	52.9857	60.1518
2010	60.5465	43.0064	40.5094	30.6292	91.6527	96.2024	109.385	125.51	79.3459	131.005	106.157	128.406	96.085	152.465
基本养老保险覆盖率	41.3556	59.4656	23.3719	20.9373	18.7457	53.1108	26.9527	64.7245	9.28994	13.0804	13.2548	14.6249	17.8206	7.50684
	27.6124	21.8473	16.149	63.2055	10.218	29.7413	17.3001	0.636483	13.4076	7.67409	9.60642	11.2188	12.635	4.66882
	19.4853	17.1113	6.17688	7.74999	33.2875	37.4665	44.8744	26.2721	13897.4	8.5859	24.5072	11.0926	35.877	13.3193
社会保障财政支出占财政支出比例	8.44174	10.1616	12.7335	15.5599	13.5117	12.4982	13.9581	12.1362	14.2123	13.5752	14.7095	13.9126	13.8626	12.3277
2015	7.34507	13.0918	15.9309	15.3175	16.8069	18.6887	16.5264	12.9665	17.6109	13.3356	15.8785	16.8539	16.1244	12.8439
2010	10.5243	15.7761	21.9091	18.0016	17.9204	18.1147	21.1118	15.0699	21.3738	14.9425	17.8769	18.5188	15.7857	16.3407
地方财政收入占GDP比	9.05982	6.58767	4.95786	4.94428	4.68009	3.81677	5.01076	5.77172	4.20398	5.72976	6.11045	5.95561	4.79839	8.89106
2015	8.44813	8.1951	6.89248	74.8167	6.61236	4.43402	5.48702	7.05296	5.06359	8.08377	6.52103	5.7774	4.63913	9.27241
2010	6.9118	6.11835	5.29967	5.34328	4.33497	3.37147	4.68499	5.89979	3.43905	5.7971	4.30319	5.2852	4.42131	5.85857
第三产业增加值占GDP比重	57.4822	45.4836	42.6439	54.368	51.1998	47.9662	46.4332	69.5714	39.9389	50.021	49.3154	55.8369	49.4107	56.4301
2015	45.0612	35.0502	36.9139	40.1568	41.7859	38.8777	41.2083	65.6645	39.33	35.5778	41.714	43.6835	35.0201	52.8446
2010	41.9616	32.5187	33.399	35.9203	37.8886	31.8054	35.2088	62.3474	36.7145	33.3336	38.8287	42.7591	31.5378	43.7834
高新技术产业增加值占工业增加值比重	101.127	78.5836	86.8089	70.8735	84.3143	69.0576	38.9732	52.0721	64.1318	73.6934	69.6671	73.1584	66.4605	29.6244
2015	72.8966	44.4959	630.118	31.9757	54.3415	41.0429	19.4811	9.02548	45.0021	45.0665	30.63	13.1725	24.3261	16.244
2010	34.3365	74.1744	44.71	25.9851	22.0965	24.1975	15.5202	11.2934	19.5607	14.1647	8.25826	11.2895	36.5781	13.0939
研究与实验发展经费支出占财政支出比例	23.8152	21.6126	20.1666	10.9836	4.74905	11.5211	9.19584	1.99065	9.06941	6.54734	6.83852	6.46095	9.14934	1.42174
2015	20.3587	12.7354	8.88249	3.97171	2.37219	12.8567	7.25783	0.44253	4.64677	4.07143	1.2396	1.32833	4.85191	0.384831
2010	15.1113	21.3606	18.2738	5.23479	1.15034	8.48811	9.16887	0.348887	2.49668	2.37193	2.04087	1.1102	9.11112	0.418117
万人有效发明专利拥有量	32.8125	10.835	15.2045	2.93126	4.89675	4.69644	7.37505	7.53361	5.254	6.45361	5.7815	10.2736	7.11934	3.3006
2015	19.6897	15.0831	13.369	2.2678	3.21412	3.24025	3.87926	3.18898	1.16548	3.87933	4.39619	2.03811	4.17635	0.89201
2010	8.81873	5.90081	4.04404	0.344133	0.585331	0.888947	4.45856	1.52432	0.936355	1.43098	1.97813	0.253752	4.15009	2.82622
互联网用户普及率	43.1874	30.053	42.561	26.7306	8.65656	31.1994	30.3076	38.6897	16.3879	29.6986	24.4949	28.5864	36.2891	26.8475
2015	24.2566	0.16123	14.7324	9.9448	4.59947	10.4633	10.4896	15.4856	9.45535	13.4878	32.4567	10.0967	11.7336	8.9201
2010	12.5627	7.20749	5.41385	4.54927	9.2635	16.4324	14.2073	41.6947	11.1073	13.5026	10.2147	15.5441	16.311	18.641
社区卫生服务中心占比	15.7018	1.31752	1.1052	0.931139	0.877193	1.26152	2.52515	1.77743	1.12782	1.04216	0.673094	0.407201	0.440852	0.336494
2015	15.8416	0.87073	1.09933	0.464885	1.58311	0.665557	1.62554	0.58651	1.09739	0.456432	0.49975	0.49904	0.348779	0.161031
2010	14.0883	1.83959	0.924809	0.234512	1.64384	0.601464	1.42552	1.81269	2.83843	1.1213	2.26782	1.29422	0.224341	1.92926
公共管理、社会保障和社会组织人员占比	1.18033	1.37196	1.19629	1.15331	1.03485	1.31364	1.26073	2.11409	1.143	1.17982	1.2724	1.45009	1.14199	1.40183
2015	1.0797	1.21185	0.938804	1.04168	0.890329	1.19747	0.968668	1.41844	0.898077	1.12716	1.23987	1.25126	1.13144	1.42661
2010	1.12985	0.967359	1.04843	1.06712	3.1357	4.38591	3.09448	4.21296	3.50387	4.22433	4.13732	4.46437	4.24114	5.6368

## Sheet: 城市建设统计年鉴
长沙	8.77	6.28	长沙市	6.28
浏阳	3.79		株洲市	9.345
株洲	11.63	9.345	湘潭市	8.65333
醴陵	7.06		衡阳市	5.865
湘潭	7.38	8.65333	邵阳市	7.315
湘乡	9.59		岳阳市	7.23
韶山	8.99		常德市	7.065
衡阳	5.12	5.865	张家界市	9.43
耒阳	6.61		益阳市	6.58
常宁	26.33		郴州市	2.83
邵阳	7.78	7.315	永州市	7.4
武冈	6.85		怀化市	6.75
岳阳	7.6	7.23	娄底市	7.5
汩罗	5.19		湘西州	8.58667
临湘	8.9
常德	6.31	7.065
津市	7.82
张家界	9.43	9.43
益阳	6.02	6.58
沅江	7.14
郴州	1.47	2.83
资兴	4.19
永州	7.4	7.4
怀化	4.04	6.75
洪江	9.46
娄底	7.5	7.5
冷水江	5.67
涟源	8.57
吉首	11.52	8.58667
